# Supplementary material for: Atypical polypoid adenomyoma follow-up and management: Systematic review of case reports and series and meta-analysis
Source: PubMed Central journal article supplement (PMC7328951; doi:10.1097/md.0000000000020491), 2020-06-26

**Supplemental Figure 1A-** Summary diagram of the methodological quality analysis of the included studies (part 1). Color legend: green (+) item present (high quality), yellow (?) not clear, and red (-) item missing (low quality).

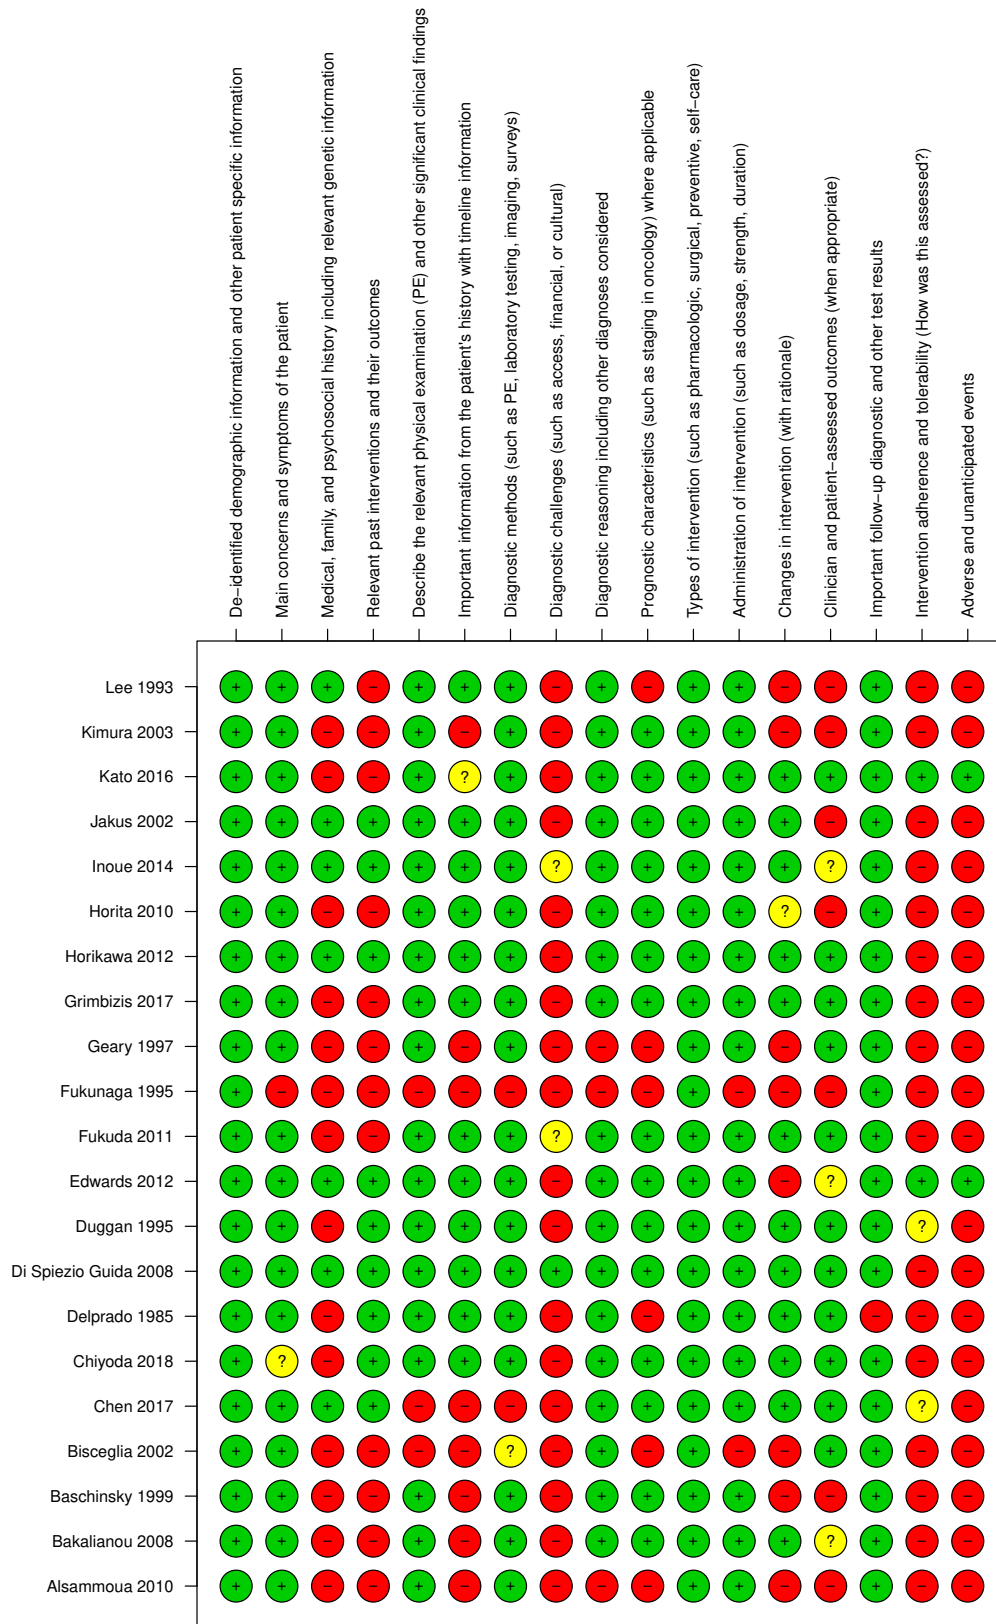

Supplement: medi-99-e20491-s001.pdf [file medi-99-e20491-s001.pdf]
