# Supplementary material for: Atypical polypoid adenomyoma follow-up and management: Systematic review of case reports and series and meta-analysis
Source: PubMed Central journal article supplement (PMC7328951; doi:10.1097/md.0000000000020491), 2020-06-26

**Supplemental Figure 3-** Forest-plot of APA relapse prevalence without considering the specific time-to-event follow-up. Summary forest-plot we stratified between the cases where medical therapy after surgery was performed or not.

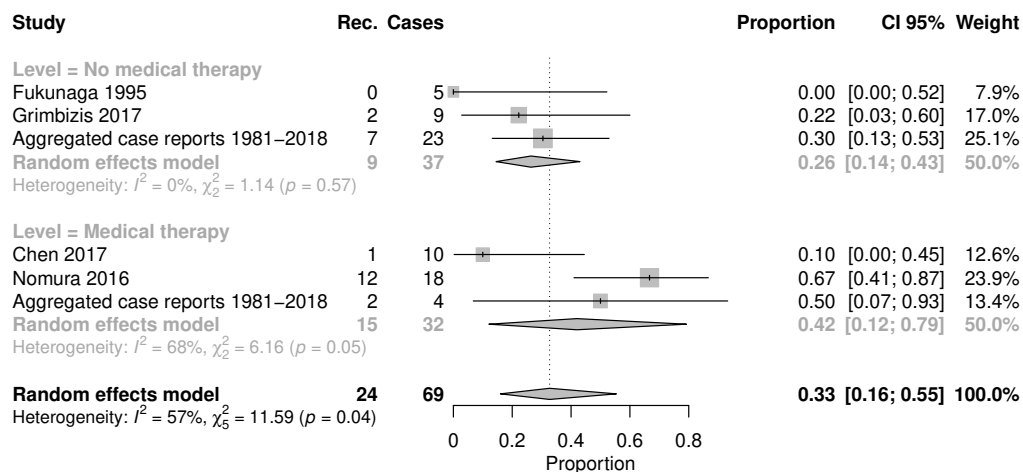

Supplement: medi-99-e20491-s004.pdf [file medi-99-e20491-s004.pdf]
