# Supplementary material for: Atypical polypoid adenomyoma follow-up and management: Systematic review of case reports and series and meta-analysis
Source: PubMed Central journal article supplement (PMC7328951; doi:10.1097/md.0000000000020491), 2020-06-26

**Supplemental Figure 5-** Forest-plot of the prevalence of endometrial neoplasia diagnosis during follow-up (without considering time-to-event data). Cases with hysterectomy at diagnosis were excluded. Case series with less than five cases and individual case reports were aggregated.

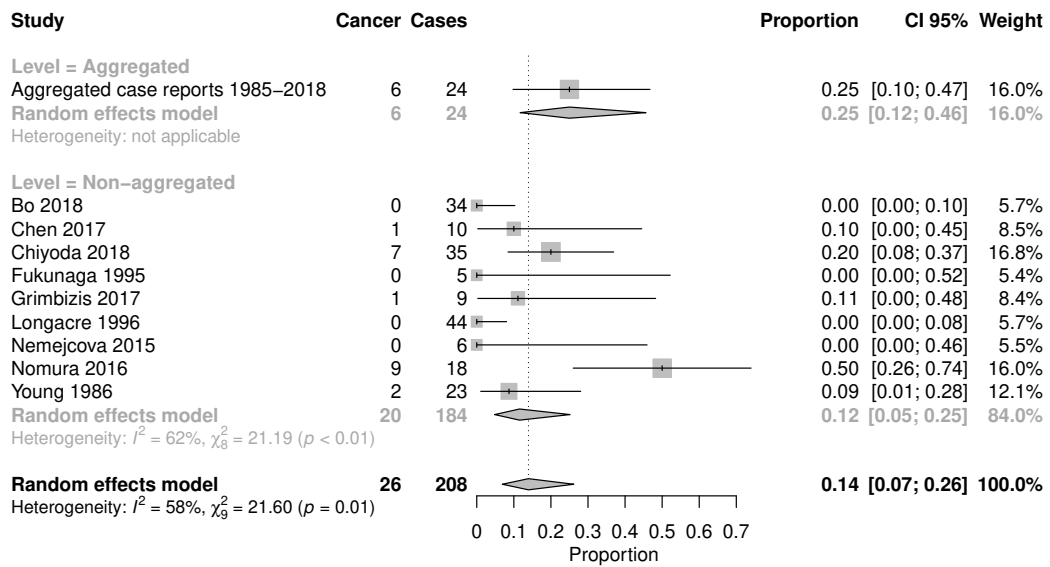

Supplement: medi-99-e20491-s006.pdf [file medi-99-e20491-s006.pdf]
