# Supplementary material for: Atypical polypoid adenomyoma follow-up and management: Systematic review of case reports and series and meta-analysis
Source: PubMed Central journal article supplement (PMC7328951; doi:10.1097/md.0000000000020491), 2020-06-26

**Supplemental Figure 6-** Forest-plot of the prevalence of concomitant or during the follow-up diagnosis of associated endometrial hyperplasia (without considering time-to-event data). Case series with less than five cases and individual case reports were aggregated.

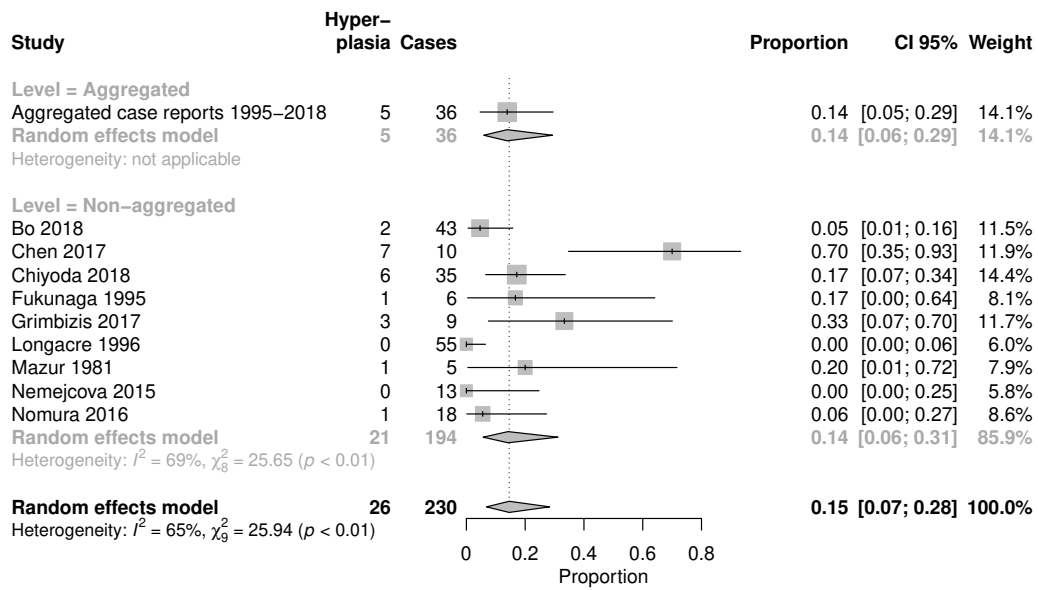

Supplement: medi-99-e20491-s007.pdf [file medi-99-e20491-s007.pdf]
