# Supplementary material for: Atypical polypoid adenomyoma follow-up and management: Systematic review of case reports and series and meta-analysis
Source: PubMed Central journal article supplement (PMC7328951; doi:10.1097/md.0000000000020491), 2020-06-26

**Supplemental Figure 7-** Forest-plot of the prevalence of concomitant finding (at the time of APA diagnosis) of endometrial hyperplasia. The time-to-event follow-up is not considered in this analysis. Case series with less than five cases and individual case reports were aggregated.

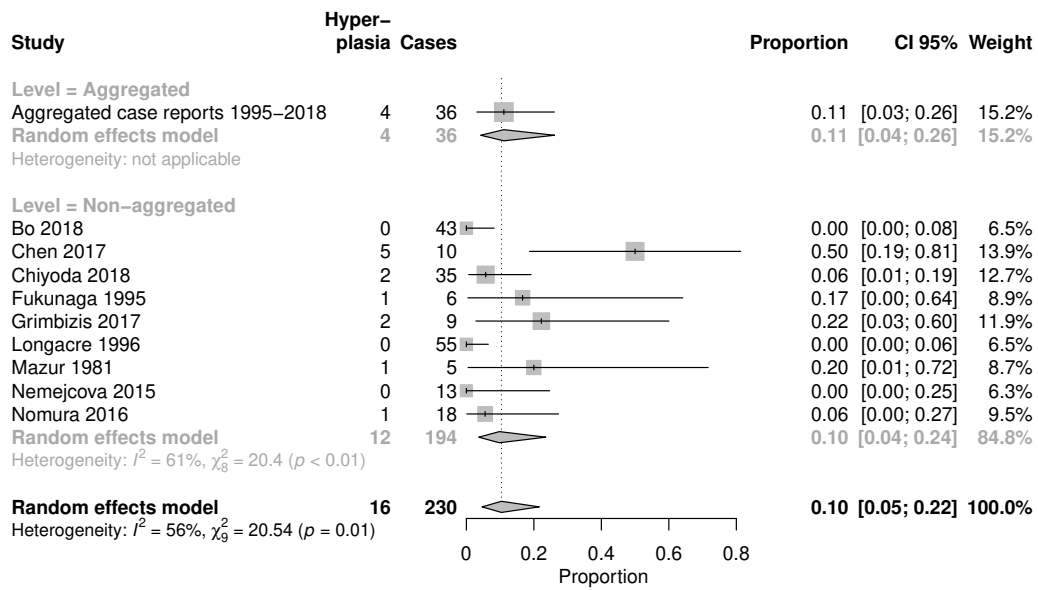

Supplement: medi-99-e20491-s008.pdf [file medi-99-e20491-s008.pdf]
