# Supplementary material for: Atypical polypoid adenomyoma follow-up and management: Systematic review of case reports and series and meta-analysis
Source: PubMed Central journal article supplement (PMC7328951; doi:10.1097/md.0000000000020491), 2020-06-26
Supplement: medi-99-e20491-s012.pdf [file medi-99-e20491-s012.pdf]

**Supplemental Table 1-** Questions underlying this review.

|   |                                                                                                                                                                                                                                        |
|---|----------------------------------------------------------------------------------------------------------------------------------------------------------------------------------------------------------------------------------------|
| 1 | In APA affected woman of childbearing age, what is the effect of conservative treatment on disease recurrence, pre-neoplastic lesions, cancer (concomitant or diagnosed during follow up), and pregnancy?                              |
| 2 | In APA affected woman of childbearing age, what is the effect of conservative operative hysteroscopic treatment compared to other conservative treatments or hysterectomies on disease recurrence, pre-neoplastic lesions, and cancer? |
