# Supplementary material for: Atypical polypoid adenomyoma follow-up and management: Systematic review of case reports and series and meta-analysis
Source: PubMed Central journal article supplement (PMC7328951; doi:10.1097/md.0000000000020491), 2020-06-26
Supplement: medi-99-e20491-s013.pdf [file medi-99-e20491-s013.pdf]

**Supplemental Table 2-** Characteristics of the included studies. (\*) From the available data they appear to be two different case reports.

| Study                 | Location                                                                                       | Cases number | Single case information extraction |
|-----------------------|------------------------------------------------------------------------------------------------|--------------|------------------------------------|
| Alsammoua 2010        | Dumfries and Galloway Royal Infirmary - UK                                                     | 1            | Yes                                |
| Bakalianou 2008       | University of Athens – Greece (*)                                                              | 1            | Yes                                |
| Baschinsky 1999       | Ohio State University - USA                                                                    | 1            | Yes                                |
| Bisceglia 2002        | San Giovanni Rotondo - Italy                                                                   | 1            | Yes                                |
| Bo 2018               | Central Hospital of Obstetrics and Gynecology Tianjin-China                                    | 43           | No                                 |
| Chen 2017             | Zhejiang University - China                                                                    | 10           | Yes                                |
| Chiyoda 2018          | Kawasaki Municipal Hospital - Japan                                                            | 35           | Partially                          |
| Delprado 1985         | Institute of Medical Pathology And Clinical Research, Westmead Hospital, Westmead, Australia   | 1            | Yes                                |
| Di Spiezio/Guida 2008 | University of Naples Federico II - Italy                                                       | 1            | Yes                                |
| Duggan 1995           | Foothills Hospital Calgary - Canada                                                            | 1            | Yes                                |
| Edwards 2012          | Durham and Portsmouth and Charlottesville - USA                                                | 1            | Yes                                |
| Fukuda 2011           | Toho University School of Medicine - Japan                                                     | 1            | Yes                                |
| Fukunaga 1995         | Jikei University School of Medicine - Japan                                                    | 6            | Yes                                |
| Geary 1997            | National Maternity Hospital Dublin - Ireland                                                   | 1            | Yes                                |
| Grimbizis 2017        | Aristotle University of Thessaloniki - Greece                                                  | 9            | Yes                                |
| Horikawa 2012         | National Defense Medical College - Japan                                                       | 1            | Yes                                |
| Horita 2010           | Kyorin University School of Medicine - Japan                                                   | 1            | Yes                                |
| Inoue 2014            | Meiwa General Hospital/Hyogo College of Medicine/Okubo Hospital/Takemura Ladies Clinic – Japan | 1            | Yes                                |
| Jakus 2002            | Thomas Jefferson University - USA                                                              | 1            | Yes                                |
| Kato 2016             | Saiseikai Kyoto Hospital - Japan                                                               | 1            | Yes                                |
| Kimura 2003           | National Maizuru Hospital - Japan                                                              | 1            | Yes                                |
| Lee 1993              | University of Vermont - USA                                                                    | 1            | Yes                                |
| Longacre 1996         | Stanford University Medical Center - USA                                                       | 55           | No                                 |
| Matsumoto 2013        | Shikoku Cancer Center - Japan                                                                  | 29           | No                                 |
| Mazur 1981            | Northwestern University - USA                                                                  | 5            | Yes                                |
| Mittal 1995           | New York University Medical Center - USA                                                       | 1            | Yes                                |
| Nakabayashi 2018      | Tokyo Women's Medical University, Tokyo, Japan                                                 | 1            | Yes                                |
| Narumi 2018           | Jichi Medical University-Tochigi- Japan                                                        | 1            | Yes                                |
| Nejkovic 2013         | University of Belgrade - Serbia                                                                | 1            | Yes                                |
| Nemejcova 2015        | Charles University in Prague - Czech Republic                                                  | 13           | No                                 |
| Nomura 2016           | Cancer Institute Hospital Ariake - Japan                                                       | 18           | Yes                                |
| Ohishi 2008           | Kyushu University - Japan                                                                      | 7            | Yes                                |
| Protopapas 2016       | University of Athens – Greece (*)                                                              | 1            | Yes                                |
| Ramos 2003            | Principe de Asturias University Hospital – Spain                                               | 1            | Yes                                |
| Rollason 1988         | University of Birmingham - UK                                                                  | 4            | Yes                                |
| Solima 2017           | University of Milan - Italy                                                                    | 1            | Yes                                |
| Sonoyama 2014         | Sanda Municipal Hospital – Japan                                                               | 1            | Yes                                |
| Tashiro 1998          | Kumamoto Univ. School of Medicine – Japan                                                      | 1            | Yes                                |
| Tziortziotis 1997     | LITO Hospital - Greece                                                                         | 1            | Yes                                |
| Vilos 2003            | The University of Western Ontario - Canada                                                     | 1            | Yes                                |
| Wong 2007             | Kwong Wah Hospital - China                                                                     | 1            | Yes                                |
| Yahata 2011           | Niigata University Medical and Dental Hospital - Japan                                         | 1            | Yes                                |
| Yamagami 2015         | Keio University School of Medicine - Japan                                                     | 3            | Yes                                |

---

| Study      | Location                             | Cases number | Single case information extraction |
|------------|--------------------------------------|--------------|------------------------------------|
| Young 1986 | Massachusetts General Hospital - USA | 27           | No                                 |
| Zhang 2012 | Beijing Fuxing Hospital – China      | 2            | Yes                                |

---
